# Supplementary material
Source: PubMed Central journal article supplement (PMC3428387)
Supplement: CVI.00229-12_zcd999094531so3.pdf [file CVI.00229-12_zcd999094531so3.pdf]

## Supplemental Data for Online posting

Figure S1 - Density distribution of  $\log_2(\text{IgG-Ptx})$  concentrations in 56 sera with a concentration of IgG-Ptx > 400 IU/ml obtained from patients in a previous study (9).
